# Supplementary material for: Communicating scientific uncertainties
Source: Copernicus journal article supplement (doi:10.5194/sand-2-223-2023), 2023-09-06
Supplement: Supplementary file 1 [file sand-2-223-2023-supplement.pdf]

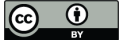

*Supplement of*  
**Communicating scientific uncertainties**

**Roman Seidl and Volker Mintzlaff**

*Correspondence to:* Roman Seidl (seidl@irs.uni-hannover.de)

The copyright of individual parts of the supplement might differ from the article licence.

Interdisciplinary Research Symposium on the Safety of Nuclear Waste Disposal Practices  
September 2023 Berlin

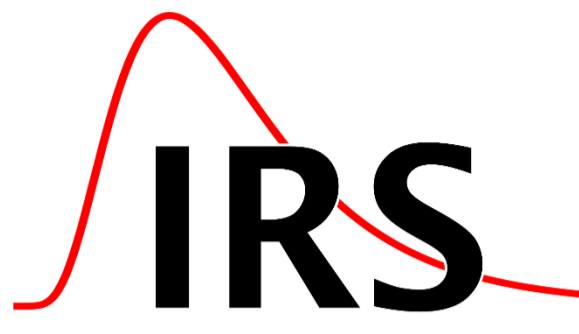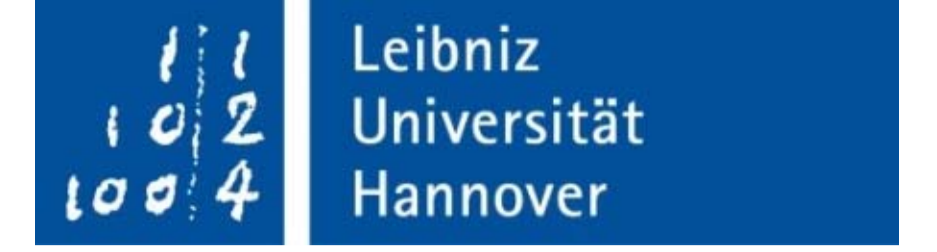

Roman Seidl  
Institute of Radioecology and Radiation Protection (IRS), Leibniz University Hanover, 30419 Hanover, Germany

## Communicating Scientific Uncertainties

### Science and uncertainty

How do you deal with the uncertainties inherent in almost any scientific activity? In science, including research on radioactive waste management, we often must deal with uncertainties arising from modelling and simulation. Communicating these to the public is good practice today. But how should we proceed, especially in the sensitive area of high-level radioactive waste?

We know from the literature that trust is a good basis for communicating scientific uncertainties and that it is important which presentation or communication format is chosen for which audience. But the details are not yet known (van der Bles et al. (2019)).

Using examples from research on deep geological disposal of high-level radioactive waste, we show how different formats and graphical representations of uncertainties are assessed in terms of confidence in the scientific validity. The sample consisted of 177 participants in an online survey with 75 women (42%) and 102 men (58%). The mean age was 44 years.

### Three basic communication formats

How can and should uncertainties be most skillfully communicated or presented? There are basically three options:

#### Verbal

Probabilities and ranges can be communicated purely verbally, for example using vocabulary such as 'frequent', 'rare', 'unlikely' or 'twice as much' (see IPCC reports, Pachauri & Meyer, 2015).

#### Numerical

A numerical or explicitly quantitative presentation includes numbers and/or ratios and is therefore not a purely verbal description. This can be in the form of a table or text (e.g., standard deviation or the 95% confidence interval).

#### Graphical

Graphical representations of model uncertainties convey the quantitative data, e.g., in the form of graphs with error bars, lines or areas.

## Experiments

### Independent variables

In addition to socio-demographics, we used items to assess the potential impact of numeracy and verbal skills, the need for cognition concept and questions about science in general, as well as the opinion on acceptance of a potential deep ground repository in Germany.

### Experiments and conditions

Experiment (1) the variation in the form of presentation of a scientific result (verbal, numerical, graphical).

Experiment (2) the variation in the sender/source of a scientific result in numerical format (table).

### Dependent variable

The dependent variable in each experiment was the level of trust in the scientific validity of the information.

### Research Question

Can the independent variables explain preferences for (trust in) specific experimental conditions?

### Experiment (1)

#### Condition 1 (verbal)

Hier geht es um Ungewissheiten bei der Simulation der zukünftigen Entwicklungen des Endlagersystems. Diese Ungewissheiten resultieren aus der individuellen Durchführung der Materialparameterbestimmung durch Forschende. Bei der Simulation des Endlagersystemverhaltens ist die Parameterbestimmung auf Basis von Laboraten ein zentraler Schritt. Die individuelle Bestimmung der Materialparameter durch den Bearbeiter führt hierbei zu Unterschieden in den Simulationsergebnissen und somit zu Ungewissheiten in der Prognose der zukünftigen Entwicklung des Endlagers.

Bei der Betrachtung der simulierten Verformungen des Gebirges zeigen sich deutliche Unterschiede in Abhängigkeit der individuell bestimmten Materialparameter innerhalb der ersten neunzig Jahre. Die maximale simulierte Verformung des Gebirges erreicht hierbei Werte, welche zirka doppelt so hoch sind, wie bei der minimalen simulierten Verformung des Gebirges. Diese hohen Abweichungen sind jedoch zeitlich begrenzt.

Wie sehr vertrauen Sie der Aussagekraft von Simulationsergebnissen zum Endlagersystemverhalten im Zeitraum von 90 Jahren?

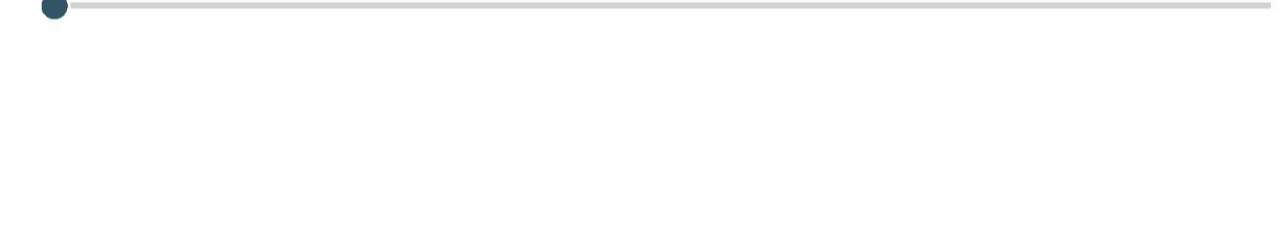

#### Condition 2 (numerical)

Hier geht es um Ungewissheiten bei der Simulation der zukünftigen Entwicklungen des Endlagersystems. Diese Ungewissheiten resultieren aus der individuellen Durchführung der Materialparameterbestimmung durch Forschende. Bei der Simulation des Endlagersystemverhaltens ist die Parameterbestimmung auf Basis von Laboraten ein zentraler Schritt. Die individuelle Bestimmung der Materialparameter durch den Bearbeiter führt hierbei zu Unterschieden in den Simulationsergebnissen und somit zu Ungewissheiten in der Prognose der zukünftigen Entwicklung des Endlagers.

Bei der Betrachtung der simulierten Verformungen des Gebirges innerhalb der ersten 90 Jahre nach Verschluss des Endlagers zeigen sich die größten Abweichungen nach ca. 20 Jahren, wobei hier der minimale Wert der simulierten Verformung bei 6 cm liegt, der maximale Wert der simulierten Verformung hingegen bei 15 cm. Der Mittelwert der Verformungen liegt bei 11 cm. Diese hohen Abweichungen sind jedoch zeitlich begrenzt.

Wie sehr vertrauen Sie der Aussagekraft von Simulationsergebnissen zum Endlagersystemverhalten im Zeitraum von 90 Jahren?

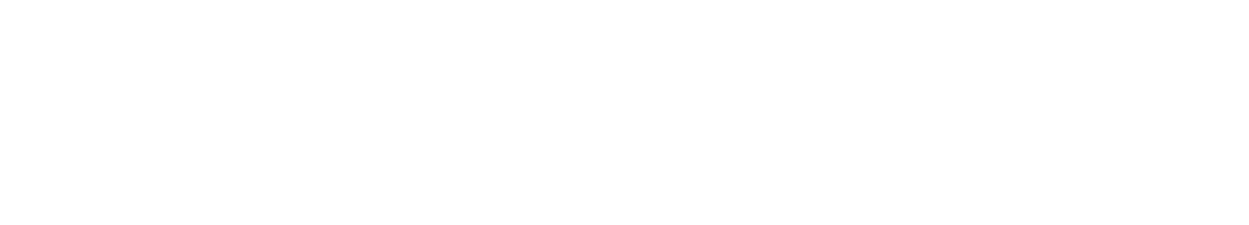

#### Condition 3 (graphical)

Hier geht es um Ungewissheiten bei der Simulation der zukünftigen Entwicklungen des Endlagersystems. Diese Ungewissheiten resultieren aus der individuellen Durchführung der Materialparameterbestimmung durch Forschende. Bei der Simulation des Endlagersystemverhaltens ist die Parameterbestimmung auf Basis von Laboraten ein zentraler Schritt. Die individuelle Bestimmung der Materialparameter durch den Bearbeiter führt hierbei zu Unterschieden in den Simulationsergebnissen und somit zu Ungewissheiten in der Prognose der zukünftigen Entwicklung des Endlagers.

Darstellung der simulierten Verformungen des Gebirges in der Tiefe basierend auf den individuell bestimmten Materialparametern. VP = Versuchsperson; Zeit [a] = Zeit in Jahren; Firste = oberer Bereich der Tunnel-/Streckentunnel; Bereich der Tunnel-/Streckentunnel.

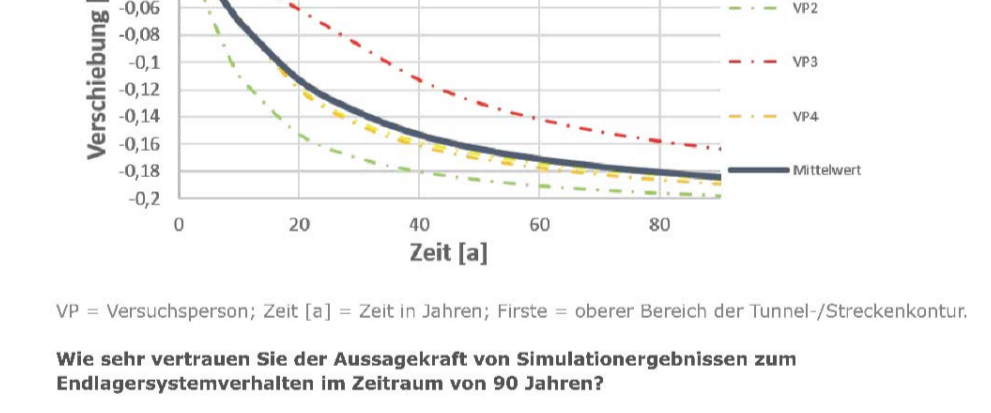

### Results Experiment (1)

Average rating - Trust in scientific validity (Scale 0 - 100)

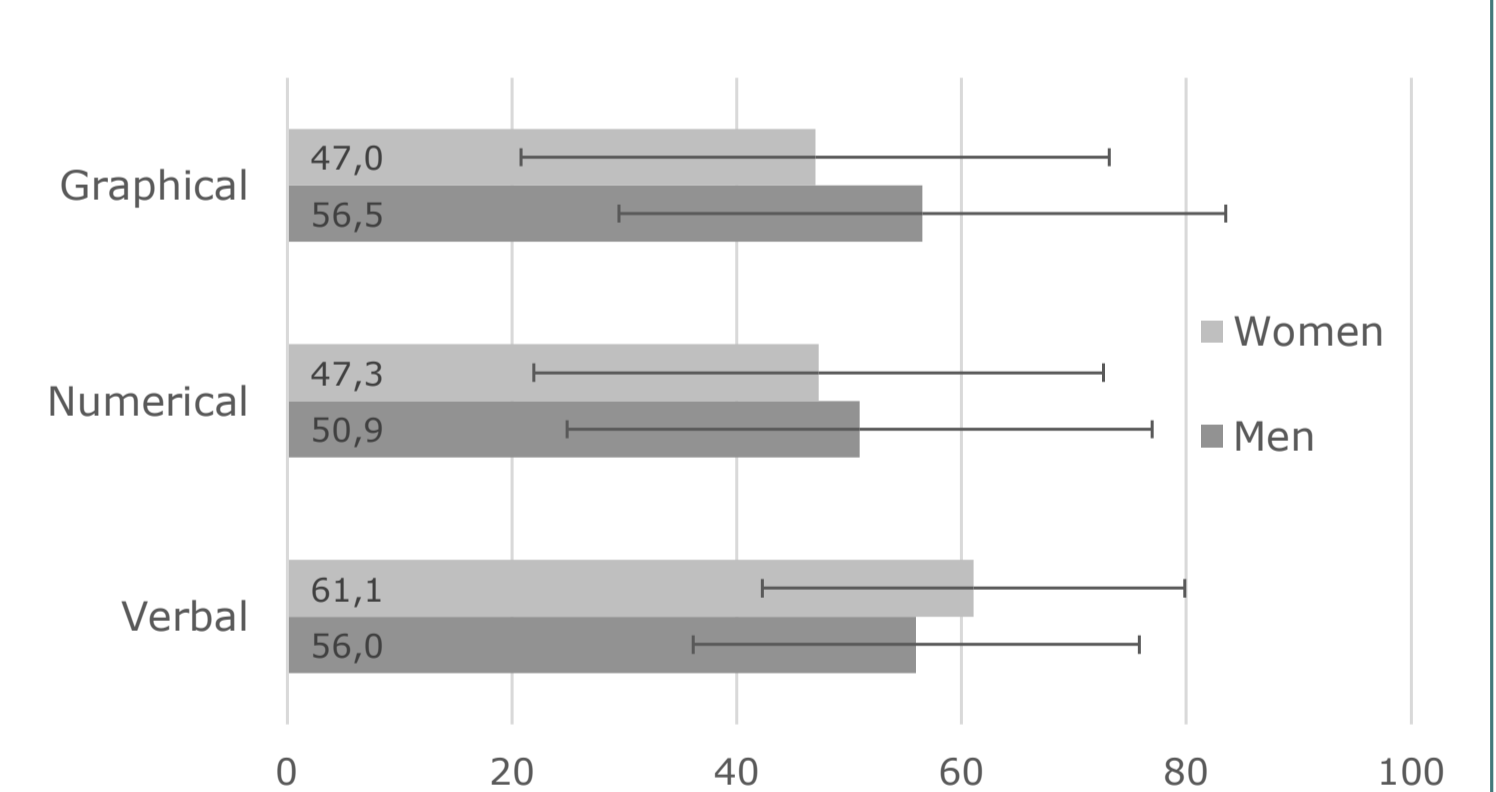

### Experiment (2)

"We show you another presentation of scientific results on the following page. It is from research on maximum annual dose (measured in microsieverts per year [ $\mu\text{Sv}/\text{year}$ ])."

| Maximale Jahresdosis [ $\mu\text{Sv}/\text{Jahr}$ ] | Mittelwert |             | 90%-Vertrauensintervall [1] |                 |
|-----------------------------------------------------|------------|-------------|-----------------------------|-----------------|
|                                                     | absolut    | relativ [2] | absolut                     | relativ         |
| Erwartete Entwicklung                               | 4,30       | 0,43        | 0,533 – 10,9                | 0,0533 – 1,09   |
| Abweichende Entwicklung 1                           | 0,393      | 0,0393      | 0,0848 – 1,05               | 0,00848 – 0,105 |
| Abweichende Entwicklung 2                           | 10,8       | 1,08        | 2,81 – 37,1                 | 0,281 – 3,71    |
| Abweichende Entwicklung 3                           | 1,93       | 0,198       | 0,274 – 5,66                | 0,0274 – 0,566  |

[1] Das 90%-Intervall ist derjenige Wertebereich, in dem der Zahlenwert mit 90-%iger Wahrscheinlichkeit liegt.  
[2] Relative Werte sind auf den Referenzwert für erwartete Entwicklungen (10  $\mu\text{Sv}/\text{Jahr}$ ) bezogen.

### Results Experiment (2)

Men and women in conditions 1 and 3 rated the information differently in terms of trustworthiness. Significant differences are shown in the assessment of the "private office for final disposal" and the "state authority". Both times, men rated these institutions as more trustworthy than women (54 and 58 vs. 42 and 44, respectively)

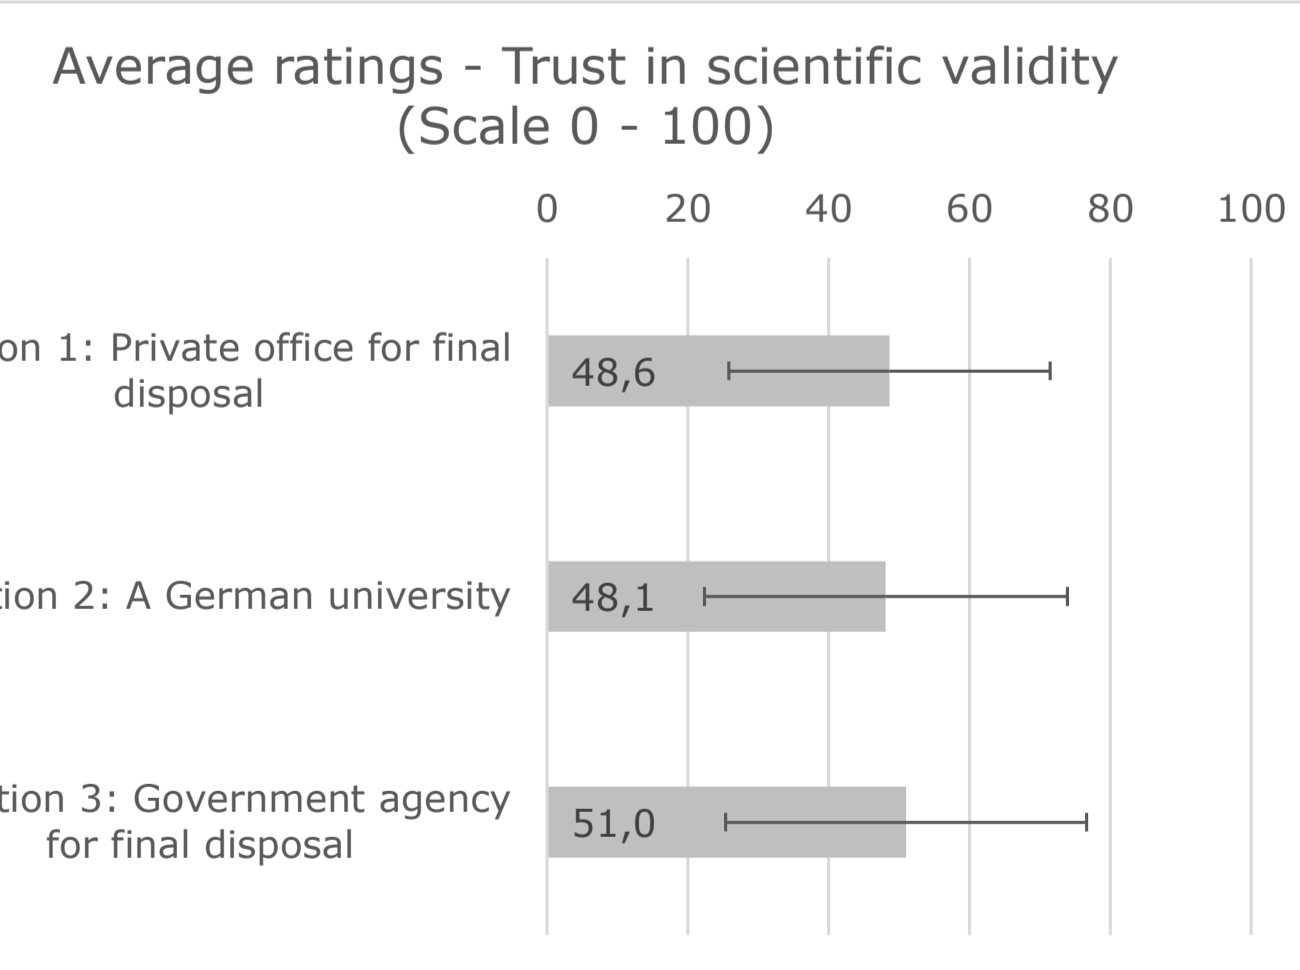

The prediction of trust in the verbal condition is not successful with the independent variables used. The attribution of trust in the numerical and graphical representation can only be significantly explained by the item on the opinion towards a repository in Germany.

## Results

The main result is: the opinion about a nuclear waste repository in Germany is the most significant explanatory variable. The opinion is therefore decisive for the trust estimates given. Numeracy has limited explanatory power. Moreover, women rate their numerical abilities less highly than men do. This indirectly influences the results. For a third experiment – a direct comparison of deterministic and probabilistic simulation results – and more details on the items, see Seidl et al. (2023).

### Literature

Pachauri, R. K.; Meyer, Leo (Hg.) (2015): Climate change 2014. Synthesis report. Geneva, Switzerland: Intergovernmental Panel on Climate Change.  
Seidl, Roman; Becker, Dirk-Alexander; Drögemüller, Cord; Wolf, Jens (2024): Kommunikation und Wahrnehmung wissenschaftlicher Ungewissheiten. In: Anne Eckhardt, Frank Becker, Volker Mintzloff, Dirk Scheer und Roman Seidl (Hg.): Entscheidungen in die weite Zukunft. Ungewissheiten bei der Entsorgung hochradioaktiver Abfälle. 1. Auflage 2024. [S.l.]: Springer VS (Energiepolitik und Klimaschutz. Energy Policy and Climate Protection).  
van der Bles, Anne Marthe; van der Linden, Sander; Freeman, Alexandra L. J.; Mitchell, James; Galvao, Ana B.; Zaval, Lisa; Spiegelhalter, David J. (2019): Communicating uncertainty about facts, numbers and science. In: Royal Society open science 6 (5), Artikel 181870, S. 1–42. DOI: 10.1098/rsos.181870.

Gefördert durch:

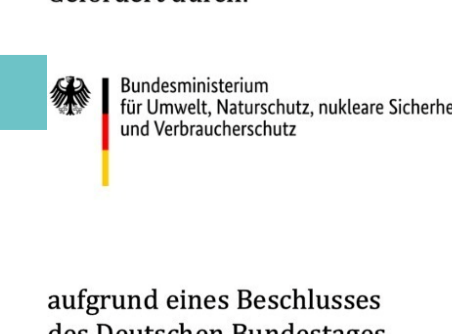

Gefördert im Niedersächsischen Vorab der Volkswagenstiftung  
VolkswagenStiftung

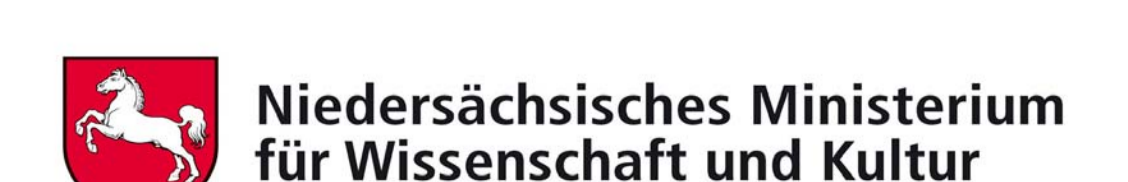

Förderkennzeichen: 02E11849A-J
